# Supplementary material for: Candidate gene biodosimetry markers of exposure to external ionizing radiation in human blood: A systematic review
Source: PLOS journal article supplement (doi:10.1371/journal.pone.0198851), 2018-06-07

**S3 Fig. Receiver operating characteristic (ROC) curve analysis of combination of two genes that display area under the ROC curve (AUC)  $\geq 0.95$  to discriminate radiation dose  $< 2$  Gy from radiation dose  $\geq 2$  Gy.**

**IER5 + ZMAT3: AUC=0.965, 95%CI=[0.912-1]**

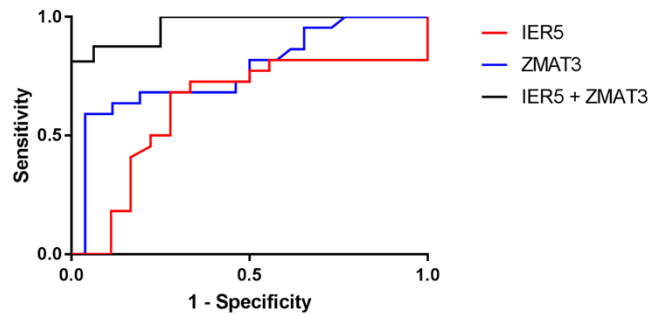

**CCNG1 + TNFSF4: AUC=0.970, 95%CI=[0.93-1]**

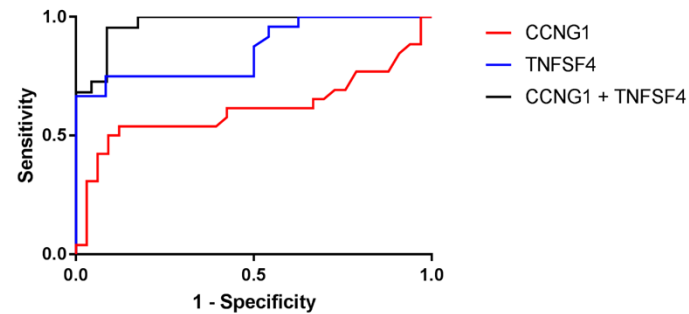

**TNFSF4 + TRIM22: AUC=0.972, 95%CI=[0.932-1]**

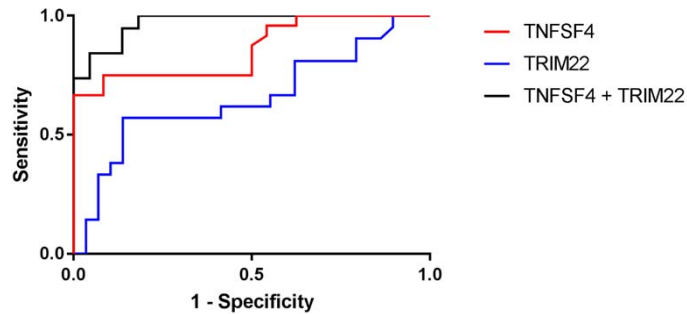

**BAX + TNFSF4: AUC=0.986, 95%CI=[0.964-1]**

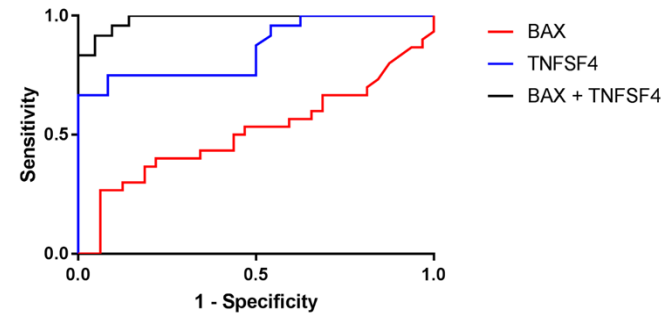

Supplement: S12 (10.1371/journal.pone.0198851.s012) [file journal.pone.0198851.s012]
